# Supplementary material for: Stimulation of Hepatic Ferritinophagy Mitigates Irp2 Depletion-Induced Anemia
Source: MDPI journal article supplement (doi:10.3390/antiox12030566), 2023-02-24
Supplement: s1 [file s1]

## Supplementary materials

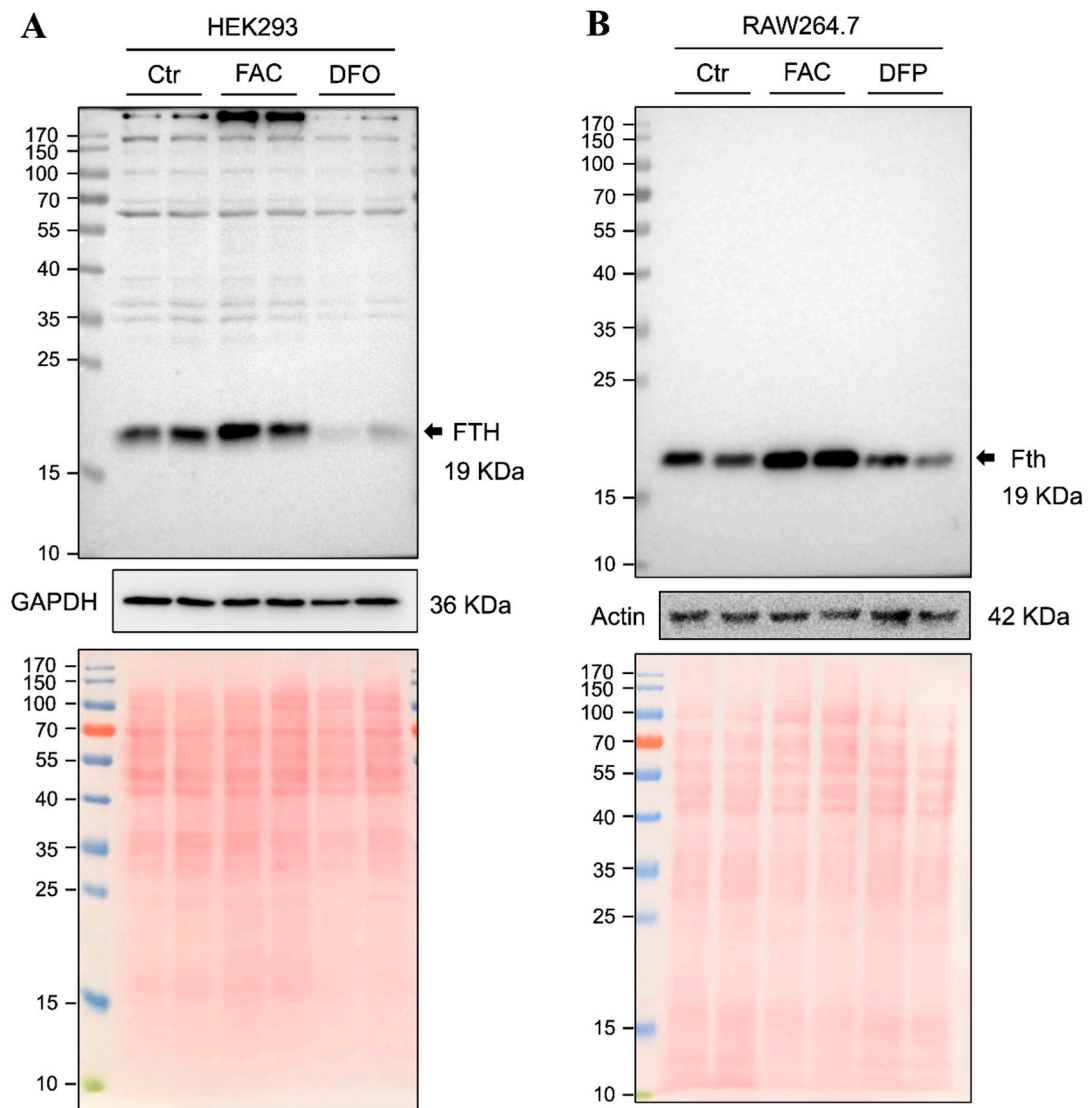

**Figure S1. The validation of self-made antibody against Fth.** Evaluation of Fth antibody with Western blot analysis in HEK293 cells (A) and RAW264.7 cells (B) after treatment with 200  $\mu$ M FAC or 100  $\mu$ M DFO for 24 h. Top panel: regular immunoblotting anti-Fth; middle panel: anti-GAPDH (A) or anti- $\beta$ -Actin (B) used as an internal control; bottom panel: Ponceau S staining.

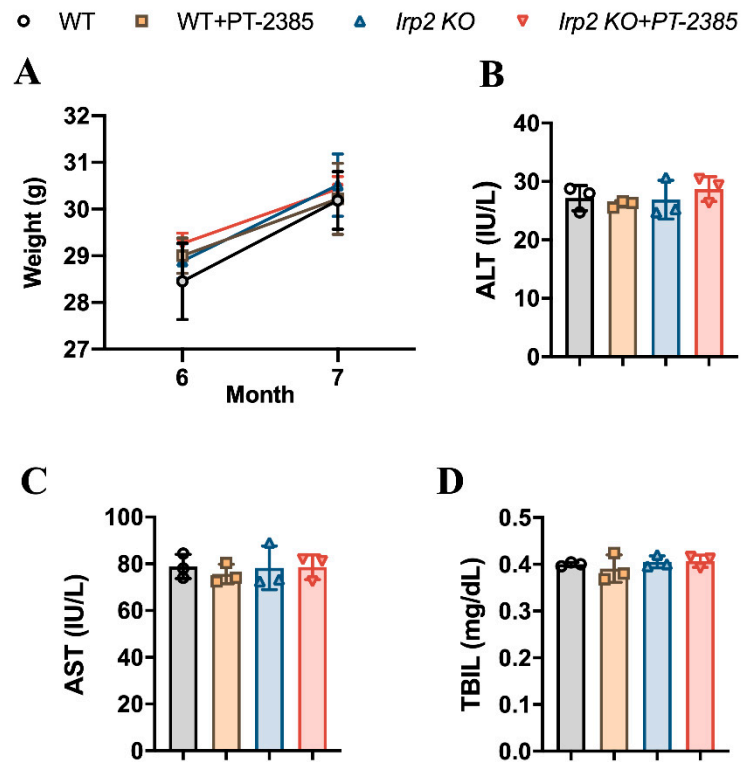

**Figure S2. Body weight and blood biochemical indices.** (A) Changes in body weight of mice during drug administration. Blood biochemical parameters: (B) alanine aminotransferase (ALT), (C) aspartate aminotransferase (AST), (D) and total bilirubin (TBil). (A)  $n=6$ , (B-D)  $n=3$ . Results are shown as the mean  $\pm$  SD. One-way ANOVA was used for significance.
